# Supplementary material for: Circulating Tumor Cells as a Marker of Disseminated Disease in Patients with Newly Diagnosed High-Risk Prostate Cancer
Source: MDPI journal article supplement (doi:10.3390/cancers12010160), 2020-01-09
Supplement: s1 [file s1]

## Article

# Circulating Tumor Cells as a Marker of Disseminated Disease in Patients with Newly Diagnosed High-Risk Prostate Cancer

Wojciech A. Cieřlikowski, Joanna Budna-Tukan, Monika řwierczewska, Agnieszka Ida, Michał Hrab, Agnieszka Jankowiak, Martine Mazel, Michał Nowicki, Piotr Milecki, Klaus Pantel, Catherine Alix-Panabières, Maciej Zabel and Andrzej Antczak

**Table S1.** Spearman (R) coefficient of correlation between CTC counts determined with various assays, age and clinical characteristics of prostate cancer patients.

| Variable             | Cell Collector®         | EPISPOT                 | Cell Search®           |
|----------------------|-------------------------|-------------------------|------------------------|
| Age (years)          | $R = -0.069, p = 0.488$ | $R = -0.026, p = 0.799$ | $R = 0.057, p = 0.597$ |
| PSA (ng/mL)          | $R = 0.049, p = 0.623$  | $R = 0.023, p = 0.821$  | $R = 0.082, p = 0.446$ |
| Gleason sum (pts)    | $R = -0.008, p = 0.939$ | $R = -0.125, p = 0.216$ | $R = 0.280, p = 0.008$ |
| D'Amico criteria (n) | $R = 0.004, p = 0.966$  | $R = -0.071, p = 0.482$ | $R = 0.190, p = 0.078$ |

**Table S2.** Distribution of clinical characteristics in prostate cancer patients who tested positively (+) or negatively (−) for CTCs with various assays.

| Assay           |                 | PSA >20 ng/mL | Gleason sum ≥8 pts | cT >2c        |
|-----------------|-----------------|---------------|--------------------|---------------|
| Cell Collector® | (+)             | 51/60 (85.0%) | 16/60 (26.7%)      | 27/60 (45.0%) |
|                 | (−)             | 30/44 (68.2%) | 13/44 (29.5%)      | 21/43 (48.8%) |
|                 | <i>p</i> -value | 0.056         | 0.826              | 0.841         |
| EPISPOT         | (+)             | 40/52 (76.9%) | 11/52 (21.2%)      | 26/51 (51.0%) |
|                 | (−)             | 37/48 (77.1%) | 18/48 (37.5%)      | 22/48 (45.8%) |
|                 | <i>p</i> -value | 0.985         | 0.081              | 0.689         |
| Cell Search®    | (+)             | 16/21 (76.2%) | 11/21 (52.4%)      | 11/21 (52.4%) |
|                 | (−)             | 56/67 (83/6%) | 14/67 (20.9%)      | 29/66 (43.9%) |
|                 | <i>p</i> -value | 0.519         | 0.011              | 0.617         |

**Table S3.** Distribution of patients with distant metastases of prostate cancer who satisfied individual criteria of tested diagnostic algorithm.

| Criteria (n) | ≥4 CTCs (Cell Search®) | PSA > 75 ng/mL | Gleason sum = 9 pts | cT > 2c | Patients (n) |
|--------------|------------------------|----------------|---------------------|---------|--------------|
| 3            | +                      | +              | −                   | +       | 2            |
| 3            | +                      | −              | +                   | +       | 2            |
| 2            | +                      | +              | −                   | −       | 1            |
| 2            | +                      | −              | +                   | −       | 1            |
| 2            | +                      | −              | −                   | +       | 2            |
| 2            | −                      | +              | −                   | +       | 3            |
| 2            | −                      | −              | +                   | +       | 1            |
| 2            | <i>n/d</i>             | +              | −                   | +       | 1            |
| 1            | +                      | −              | −                   | −       | 1            |
| 1            | −                      | +              | −                   | −       | 1            |
| 1            | −                      | −              | −                   | +       | 3            |
| 0            | −                      | −              | −                   | −       | 1            |

*n/d*—not determined.
